# Supplementary material for: Deletion of RAGE fails to prevent hepatosteatosis in obese mice due to impairment of other AGEs receptors and detoxifying systems
Source: PubMed Central journal article supplement (PMC8405685; doi:10.1038/s41598-021-96859-7), 2021-08-30

## Deletion of RAGE fails to prevent hepatosteatosis in obese mice due to impairment of other AGEs receptors and detoxifying systems.

**Wouters et al.**

**Supplementary Table 1. Primers for RT-PCR**

| PRIMER           | FORWARD                      | REVERSE                     |
|------------------|------------------------------|-----------------------------|
| RAGE             | 5'-GTCCGAGTCTACCAGATTCCT -3' | 5'-GAAGTTTCCCATCTAAGTGCC-3' |
| AGER-1           | 5'-ACCTTCAAGACCGCAGATGA-3'   | 5'-CACGTTGATGTTGCCTCCAA-3'  |
| Gal-3            | 5'-CCC GCATGCTGATCACAATC-3'  | 5'-GGGGTTAAAGTGGAAGGCAA-3'  |
| Aldose reductase | 5'-CGTGATACCTAGTGACACCGA-3'  | 5'-GCCAGGTTTGTCAAGATCCT-3'  |
| Glo-1            | 5'-CCCTGCTATGAAGTTCTCGCTC-3' | 5'-GAGCTCAAGGGTGGCTTTTCT-3' |
| Nrf2             | 5'-TTGGCAGAGACATCCCAT-3'     | 5'-GCTGCCACCGTCACTGGG-3'    |

**Supplementary Table 2. Primary antibodies for western blotting analysis.**

| ANTIBODIES                               | COMPANY                                         | CAT. NO.  |
|------------------------------------------|-------------------------------------------------|-----------|
| Mouse monoclonal anti-RAGE               | Santa Cruz Biotechnology, Inc., Dallas, TX, USA | sc-365154 |
| Rabbit Polyclonal anti-SREBP1c           | Abcam                                           | ab44153   |
| Mouse Monoclonal anti- $\alpha$ -Tubulin | Abcam                                           | ab7291    |
| Mouse Monoclonal anti-Gal-3              | Affinity BioReagents, Golden, CO, USA           | MA1-940   |
| Rabbit Polyclonal anti-ACC               | Cell Signaling Technology, Danvers, MA, USA     | 3662      |
| Rabbit Monoclonal anti-NLRP3             | Epitomics, Burlingame, CA, USA                  | 3560-1    |
| Rabbit Polyclonal anti-Glo-1             | Genetex, Irvine, CA, USA                        | GTX105792 |
| Mouse Monoclonal anti- $\beta$ -Actin    | Santa Cruz Biotechnology                        | sc-47778  |
| Rabbit Polyclonal anti-Caspase 1 (p10)   | Santa Cruz Biotechnology                        | sc-514    |
| Mouse Monoclonal anti-FASN               | Santa Cruz Biotechnology                        | sc-55580  |
| Rabbit Polyclonal anti-Histone H3        | Santa Cruz Biotechnology                        | sc-10809  |
| Mouse Monoclonal anti-IL-1 $\beta$       | Santa Cruz Biotechnology                        | sc-52012  |
| Mouse Monoclonal anti-MyD88              | Santa Cruz Biotechnology                        | sc-74532  |
| Mouse Monoclonal anti-NFkB-p65           | Santa Cruz Biotechnology.                       | sc-8008   |
| Mouse Monoclonal anti-OST48 (AGER1)      | Santa Cruz Biotechnology                        | sc-74408  |
| Rabbit Polyclonal anti-Nrf2              | Thermo Fisher Scientific, Waltham, MA, USA      | PA5-27882 |

**Supplementary Table 3.** Body weight and cytokines plasma levels in control (RAGE+/+ LeptrDb+/+), obese (RAGE+/+ LeptrDb-/-), and RAGE KO obese (RAGE-/- LeptrDb-/-) mice. Data are means  $\pm$  SEM of 5-10 animals per group. Statistical significance: \*P<0,05 vs RAGE+/+ LeptrDb+/+; §P<0,05 vs RAGE+/+ LeptrDb-/-.

|                       | RAGE+/+<br>LeptrDb+/+ | RAGE+/+<br>LeptrDb-/- | RAGE-/-<br>LeptrDb-/-      |
|-----------------------|-----------------------|-----------------------|----------------------------|
| Body weight (g)       | 24.1 $\pm$ 0.6        | 35.0 $\pm$ 5.0        | 39.5 $\pm$ 5.0             |
| IL-1 $\beta$ (pg/ml)  | 2.4 $\pm$ 0.9         | 8.0 $\pm$ 1.3*        | 2.4 $\pm$ 1.0 <sup>§</sup> |
| IFN- $\gamma$ (pg/ml) | 0.9 $\pm$ 0.1         | 2.1 $\pm$ 0.3*        | 1.1 $\pm$ 0.2 <sup>§</sup> |
| TNF- $\alpha$ (pg/ml) | 1.0 $\pm$ 0.4         | 2.3 $\pm$ 0.6*        | 0.6 $\pm$ 0.7 <sup>§</sup> |

**Supplementary Figure 1.** PCR analysis for gene expression of the AGEs detoxifying enzyme aldose reductase in liver mRNA extracts. Data are means  $\pm$  s.e.m. of 4-6 animals per group. Statistical significance: \*\*P<0,01; \*\*\*P<0,001.

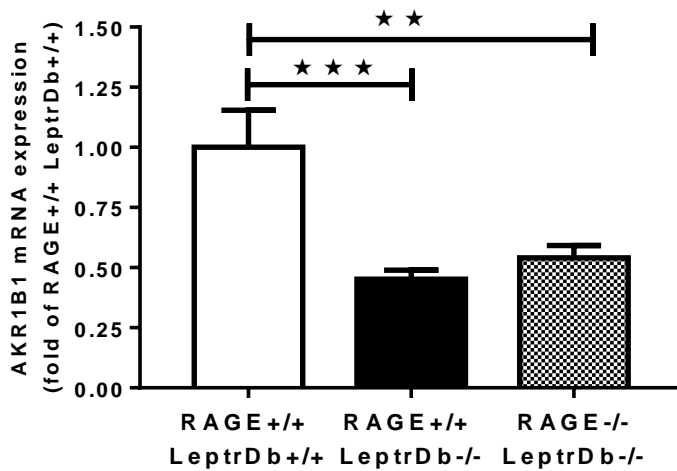

## Supporting information

Ponceau S staining

Total extracts

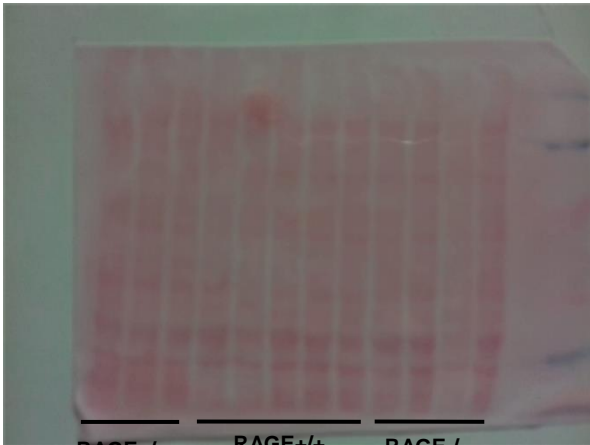

RAGE+/+  
LeptrDb+/+

RAGE+/+  
LeptrDb-/-

RAGE-/-  
LeptrDb-/-

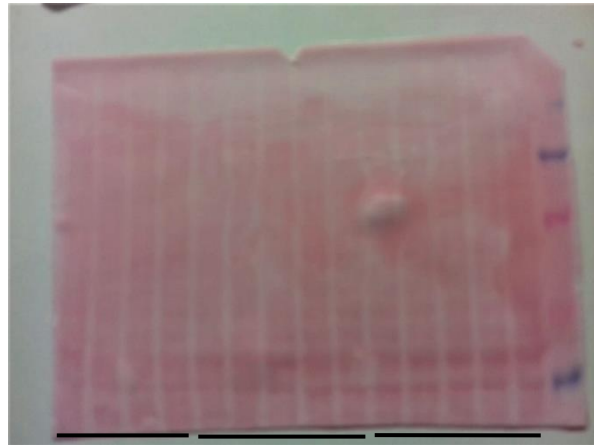

RAGE+/+  
LeptrDb+/+

RAGE+/+  
LeptrDb-/-

RAGE-/-  
LeptrDb-/-

Cytosolic extracts

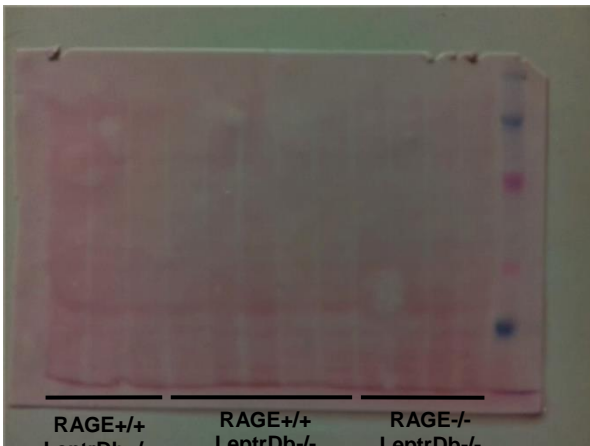

RAGE+/+  
LeptrDb+/+

RAGE+/+  
LeptrDb-/-

RAGE-/-  
LeptrDb-/-

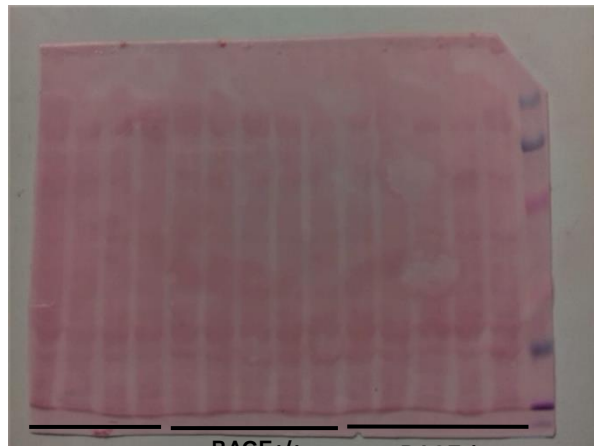

RAGE+/+  
LeptrDb+/+

RAGE+/+  
LeptrDb-/-

RAGE-/-  
LeptrDb-/-

# Original blots for western blotting figures

Figure 1.

A

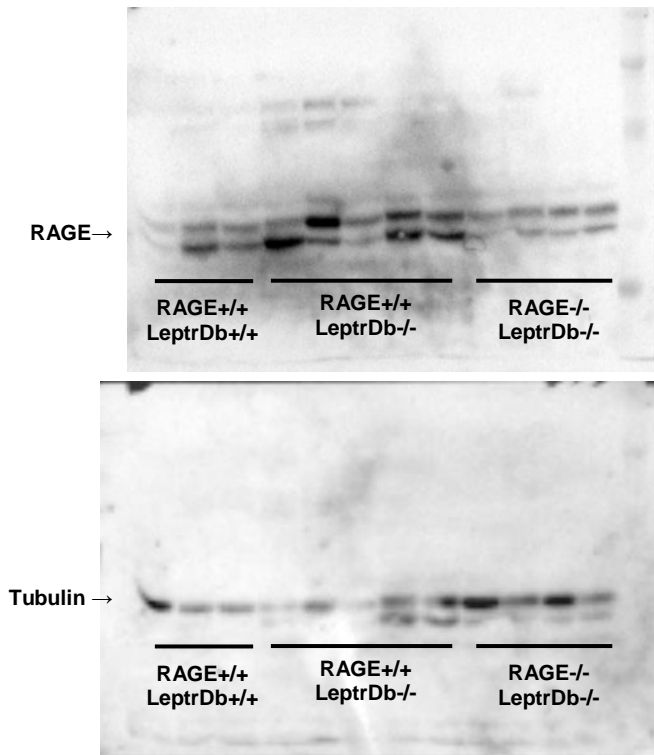

E

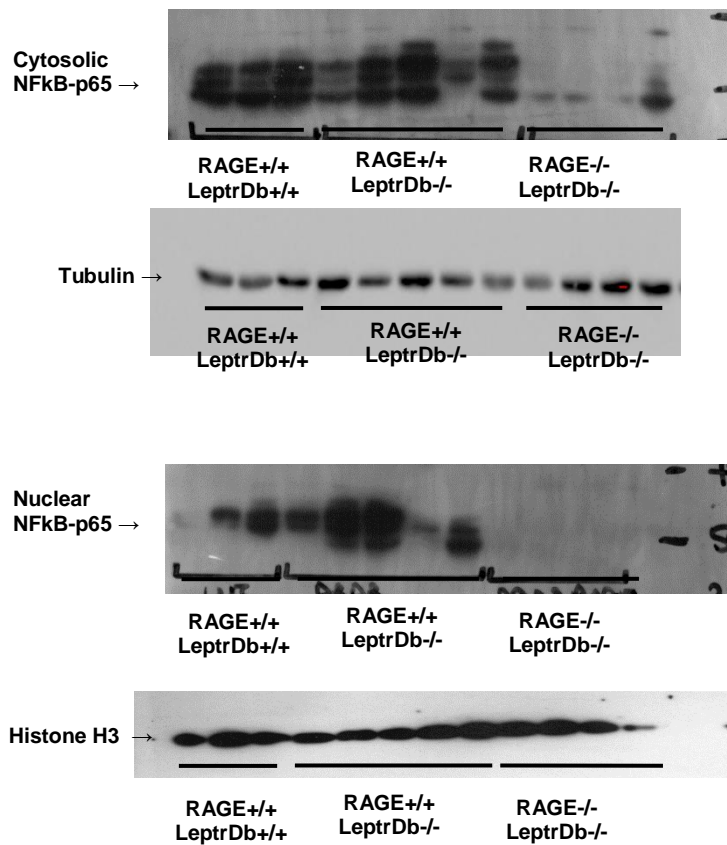

Figure 2.

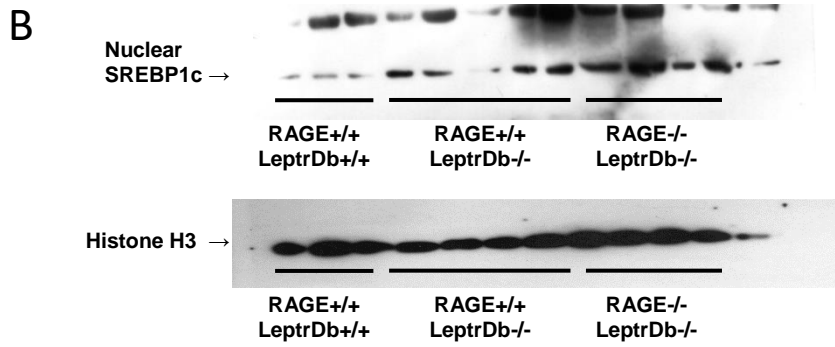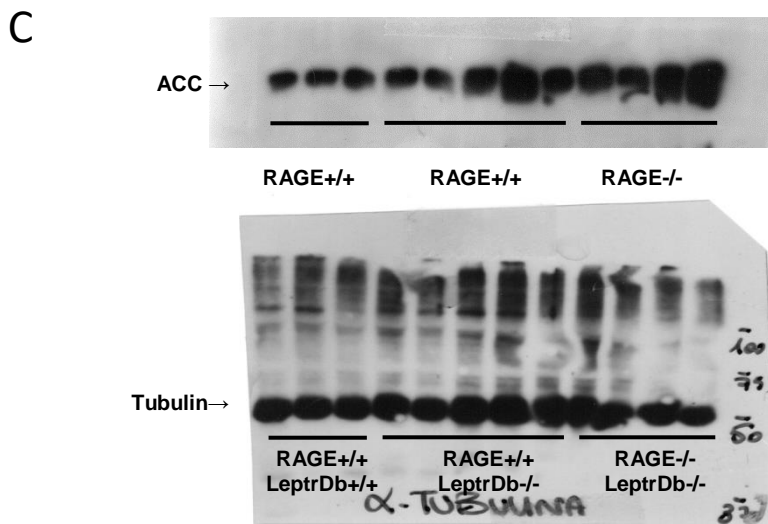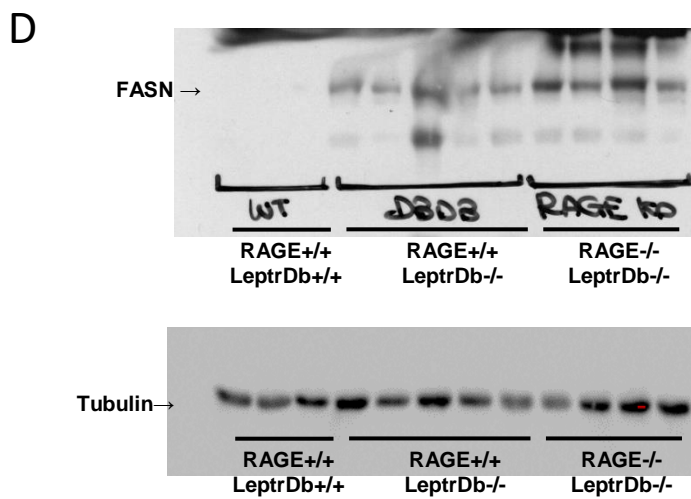

Figure 3.

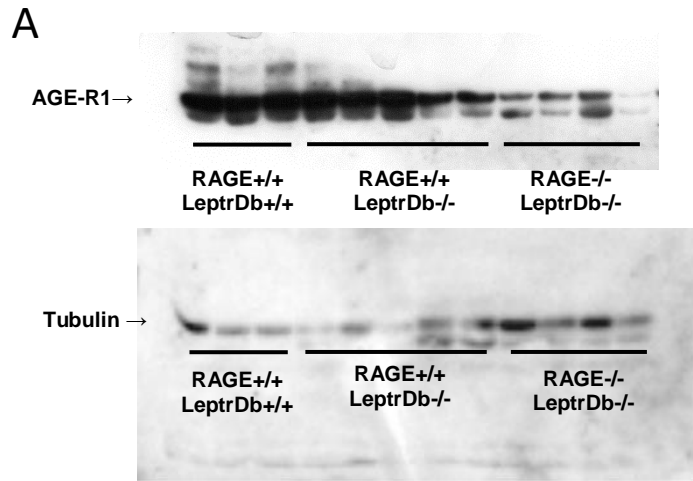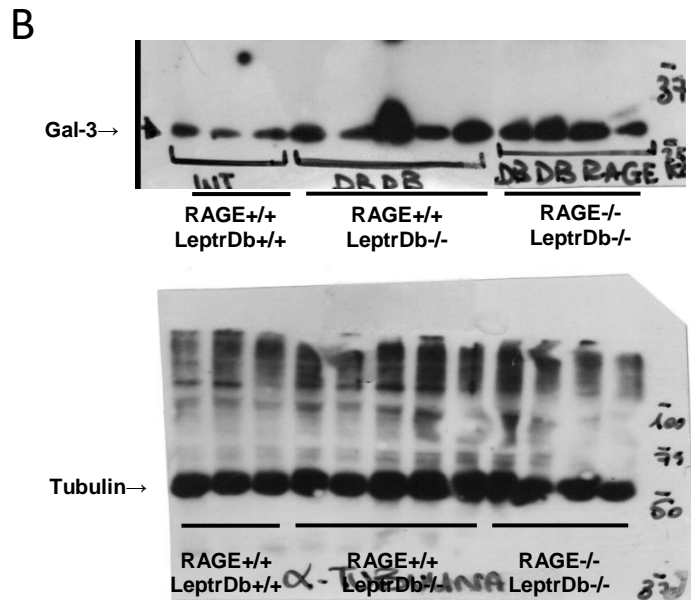

Figure 4.

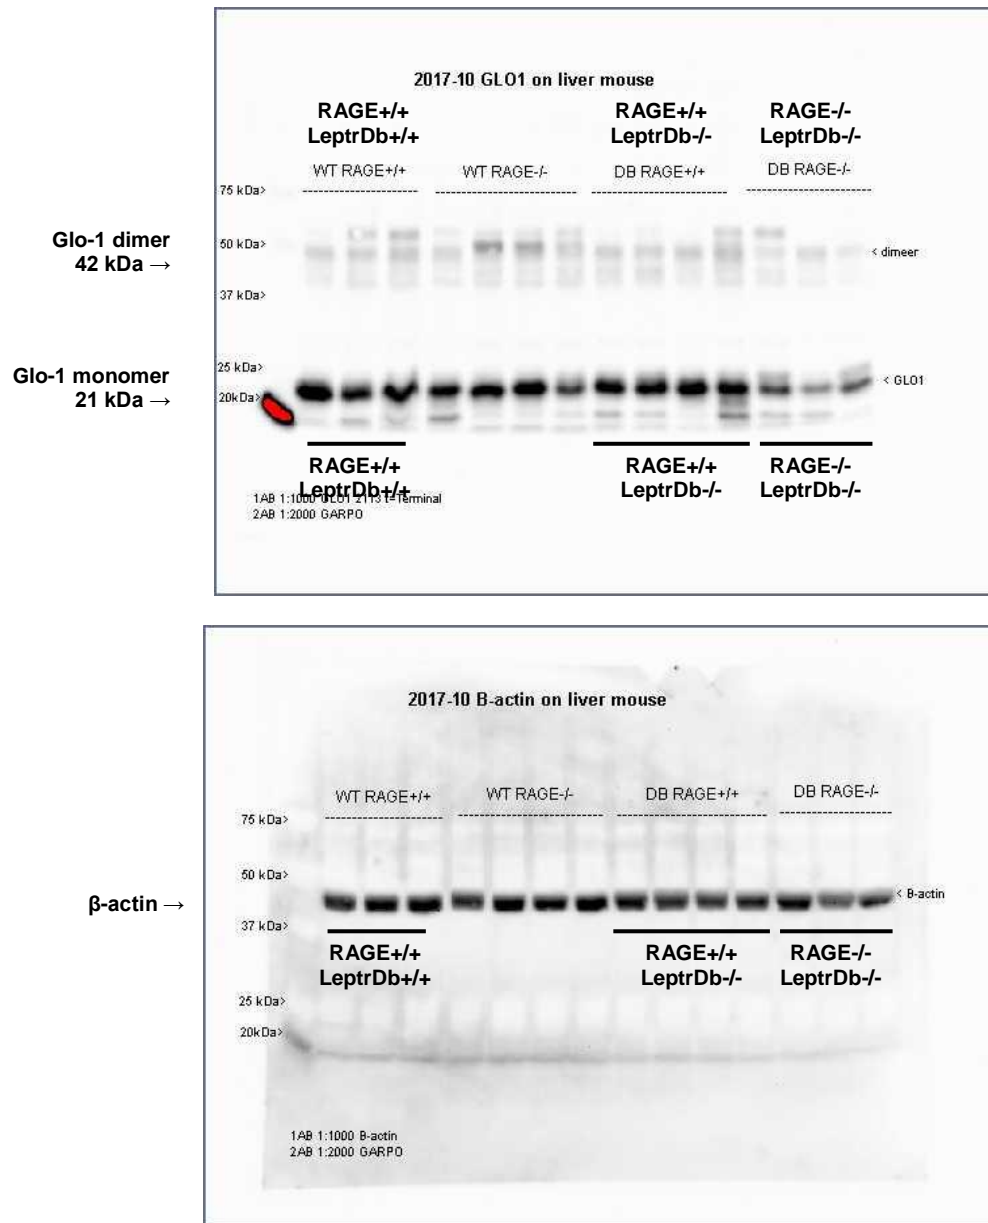

Figure 5.

B

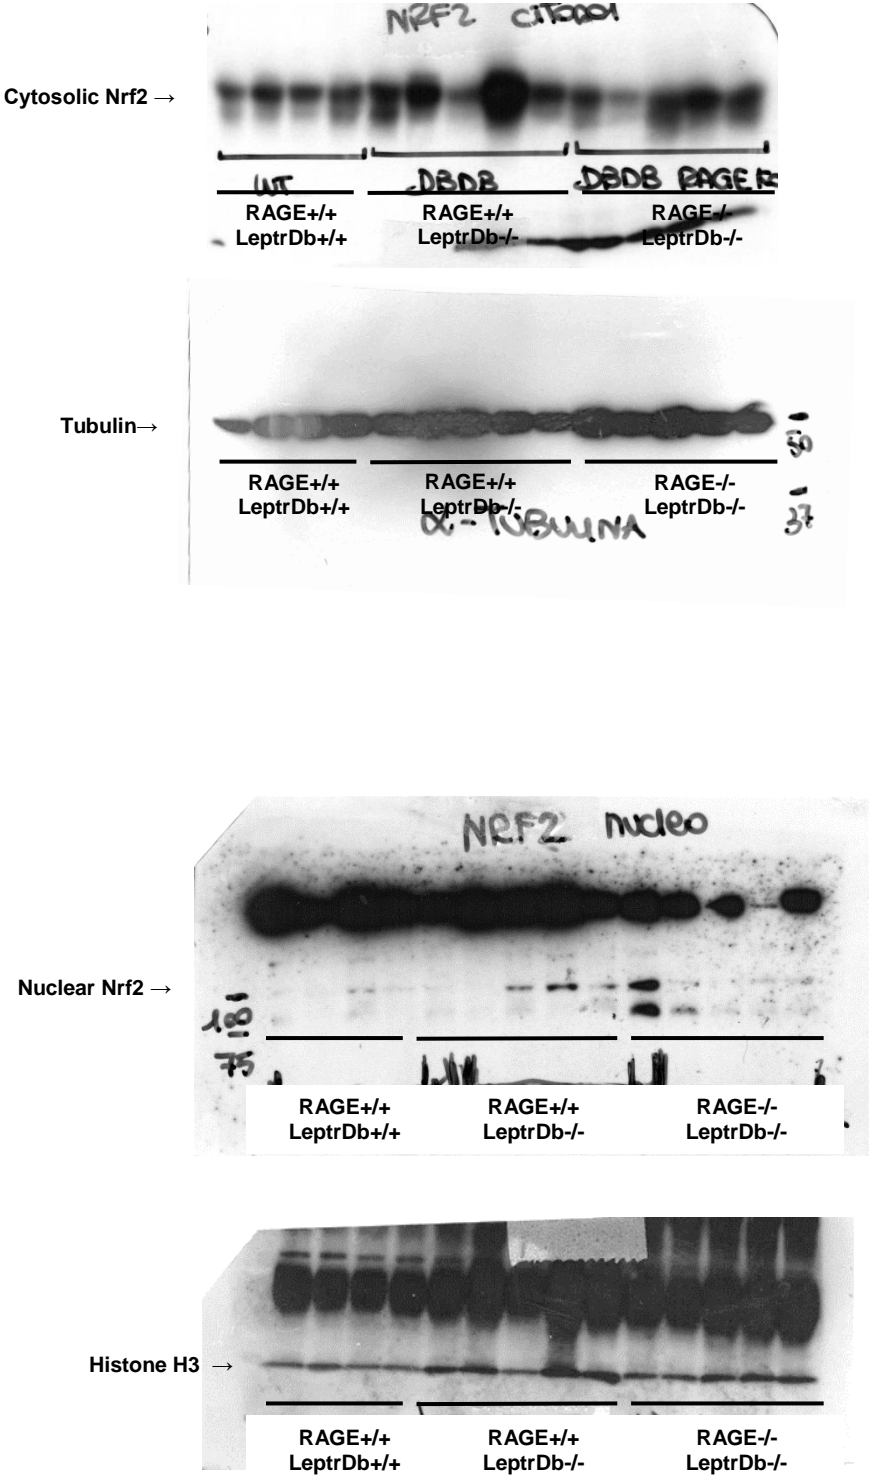



C

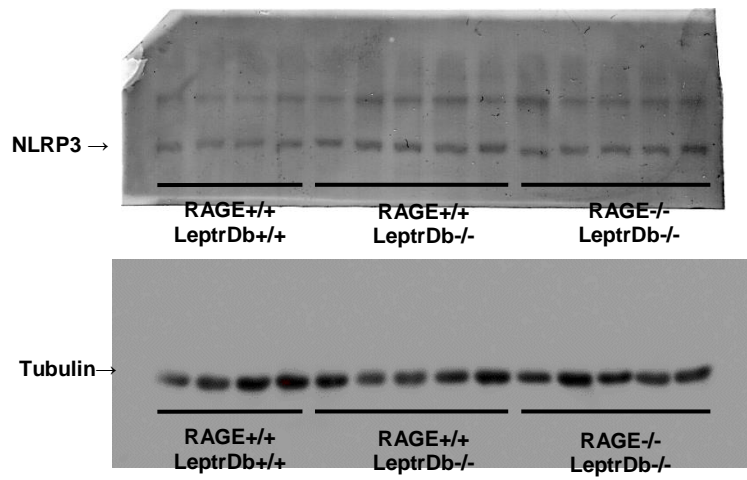

D

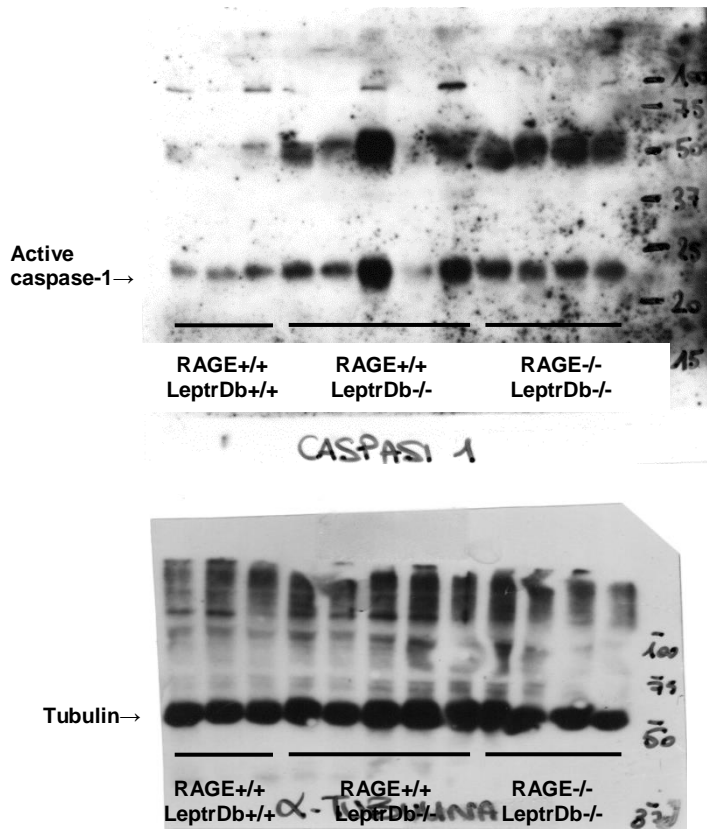

E

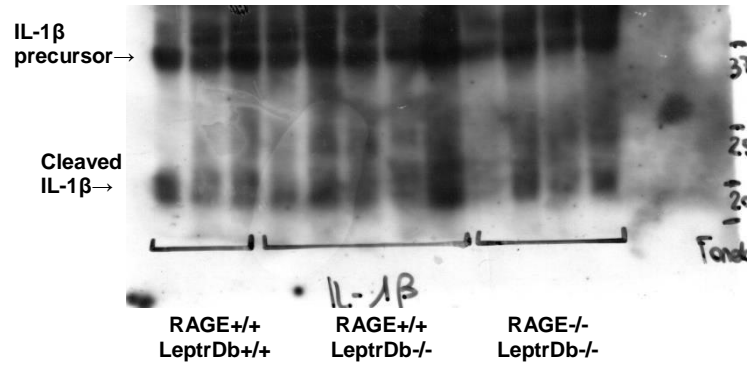

F

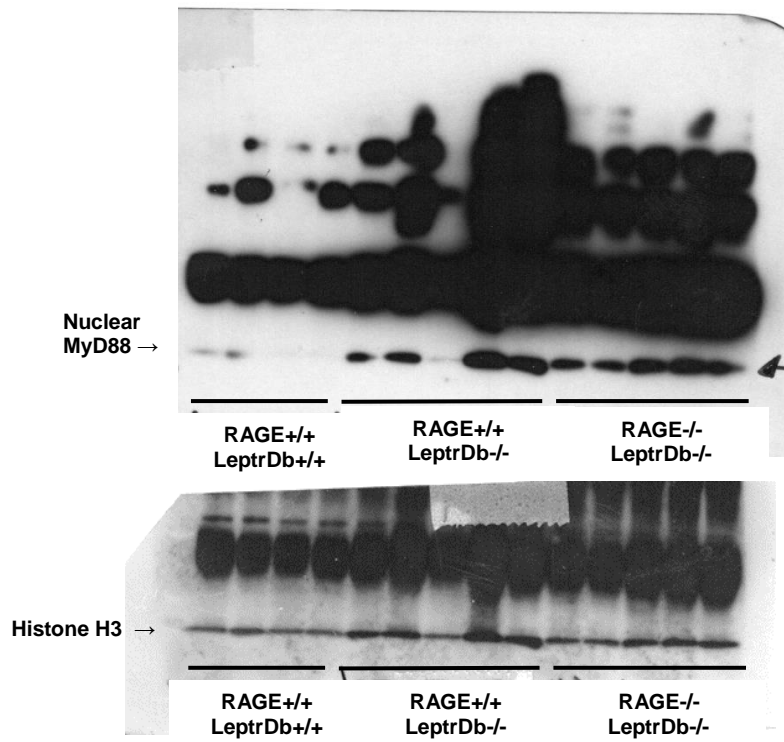

Supplement: 41598_2021_96859_MOESM1_ESM.pdf [file 41598_2021_96859_MOESM1_ESM.pdf]
